# Supplementary material
Source: Springer Nature journal article supplement (https://www.springermedizin.de/resource/supplementary/12958_2005_269_MOESM1_ESM.pdf/9567518)

**A**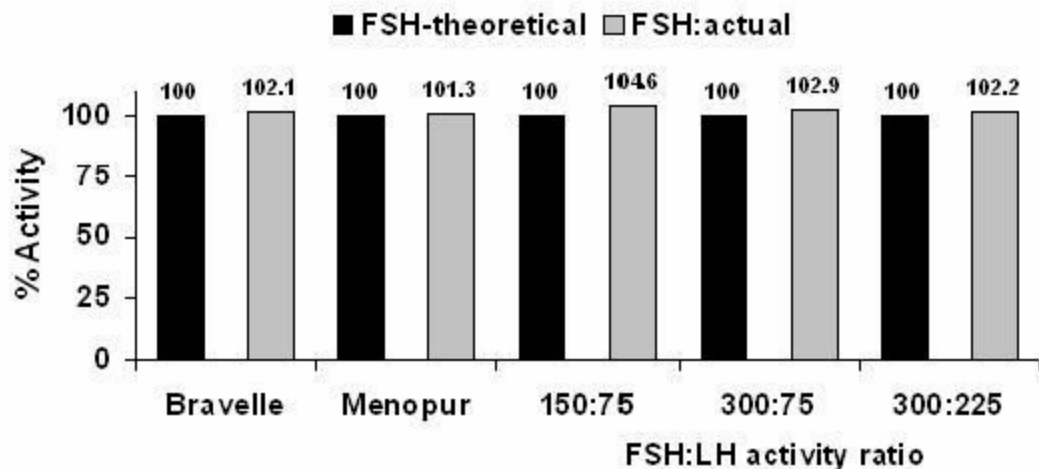**B**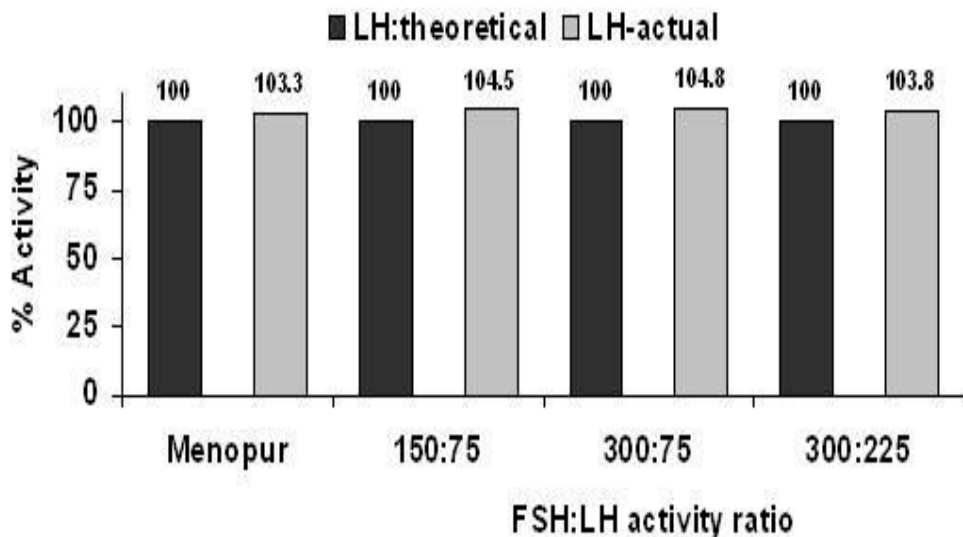

Supplement: MOESM1 [file 9567518]
